# Supplementary material for: A comprehensive study of the red persistent luminescence mechanism of Y2O2S:Eu,Ti,Mg
Source: Royal Society of Chemistry journal article supplement (doi:10.1039/c9cp04622d), 2019-01-01
Supplement: c9cp04622d1.pdf [file c9cp04622d1.pdf]

## Electronic Supplementary Information

### Comprehensive Study of the Red Persistent Luminescence Mechanism of $\text{Y}_2\text{O}_2\text{S}$ :

#### Eu, Ti, Mg

Bingyan Qu<sup>1</sup>, Juntao Wang<sup>1</sup>, Kai Liu<sup>1</sup>, Rulong Zhou<sup>1</sup>, and Lei Wang<sup>1\*</sup>

<sup>1</sup>*School of Materials Science and Engineering, Hefei University of Technology, Hefei, Anhui*

*230009, P. R. China*

#### A. The electronic structures of Mg, Zr or Si doped $\text{Y}_2\text{O}_2\text{S}$

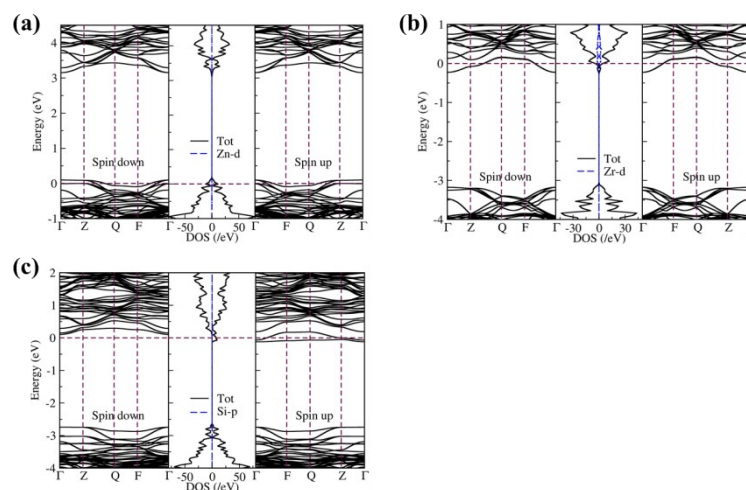

Figure S1 Computed band structures, total and partial density of states (DOS and PDOS) of  $\text{Y}_2\text{O}_2\text{S}$  with (a)  $\text{Mg}_\text{Y}$ , (b)  $\text{Zr}_\text{Y}$  and (c)  $\text{Si}_\text{Y}$ . The Fermi level is set to be 0 eV.

\* Corresponding author. E-mail: leiw03@126.com (Lei Wang)
